# Supplementary material for: Contrasting patterns of leaf trait variation among and within species during tropical dry forest succession in Costa Rica
Source: PubMed Central journal article supplement (PMC5762662; doi:10.1038/s41598-017-18525-1), 2018-01-10
Supplement: 41598_2017_18525_MOESM1_ESM.pdf [file 41598_2017_18525_MOESM1_ESM.pdf]

Supplementary information

**Contrasting patterns of leaf trait variation  
among and within species during tropical dry  
forest succession in Costa Rica**

**Géraldine Derroire, Jennifer S. Powers, Catherine M. Hulshof, Luis E. Cárdenas  
Varela and John R. Healey**

**Supplementary methods.** Detailed methods for measurements of traits and environmental factors.

### Plot ages

The successional age of each plot (*i.e.* age since the beginning of succession) was obtained from the estimates of Powers et al.<sup>1</sup>, which were based on satellite images, assessment of tree age, local knowledge and stable isotopic composition of soil carbon. The ages of plots were 12, 18, 25, 28, 32 and 27 years in the forest type dominated by oak (OAK), and 19, 20, 22, 30, 42, 67 years in the mixed-species forest type (MIX).

### Leaf trait measurements

Leaf traits were measured using standard protocols<sup>2,3</sup>. Three leaves were measured per individual except in the rare cases when the tree had an insufficient number of leaves. Because the saplings were in the understorey, we did not measure sun leaves, but instead selected three leaves that were young, fully expanded with no visible damage and located in the upper part of the sapling crown. Twigs were collected in the early morning using a tree pruner, stored in vials filled with distilled water and placed in a cool bag for transportation to the laboratory. They were stored in a refrigerator and processed on the same day. On fresh leaves, we measured leaf fresh mass (g), leaf thickness (“Thickness”) (mm) and petiole length (“Petiole”) (mm), and visually determined leaf compoundness (simple, unipinnate and bipinnate) and leaf pubescence (binary) with a magnifier. Leaf area (LA, cm<sup>2</sup>) was obtained by scanning the leaves and using the pixel counting software ImageJ<sup>4</sup>. Leaves were then oven-dried at ~60 °C for at least 72 h and re-weighed. Specific leaf area (SLA, cm<sup>2</sup> g<sup>-1</sup>) was calculated as LA/dry mass, leaf dry matter content (LDMC, mg g<sup>-1</sup>) as dry mass/fresh mass and leaf density (“Density”) (g cm<sup>-3</sup>) as dry mass/(LA x thickness). Samples of 3 g of dried leaves composed of several leaves of each individual were shipped to Bangor University for chemical analyses. Leaves were ground in a mill. Leaf C (LCC, mg g<sup>-1</sup>) and N (LNC, mg g<sup>-1</sup>) concentration were measured in ~0.05 g of leaf matter by combustion analysis using a CN Elemental Analyser (LECO Truspec, LECO Corporation, Michigan, USA) calibrated with certified plant standards (Orchard Leaves Part No. 502-055, LECO Corporation, Michigan, USA). Leaf P concentration (LPC, mg g<sup>-1</sup>) was measured by absorbance at 820 nm using a spectrophotometer (Epoch, Biotek, Vermont, USA) on ~0.2 g samples previously ashed at 500 °C and extracted in chloridric acid. We then calculated the stoichiometric ratios of CN and NP. All traits were measured on leaves including petiole and rachis because we considered them to be part of the leaf construction cost. The leaf phenological habit of each species was assigned to one of three categories (deciduous, semi-deciduous or evergreen) using data from Powers and Tiffin<sup>5</sup> supplemented by information obtained from an expert on the local flora (D. Perez Avilez personal communication).

To fully take into account ITV, we measured traits on all saplings in the plots, with the exception of cases when the number of saplings per height class, per species and per plot exceeded six (6.5% of saplings were not measured for this reason; the measured saplings were chosen randomly). In a few cases (5.6% of leaves), the absence of a sufficient number of leaves prevented measurement. For calculation of community scale values, non-measured

leaf trait values were extrapolated by taking the mean values for the leaves of, by order of priority, (1) the same individual (when less than three leaves could be sampled), (2) all individuals of the same species, height class and plot, (3) all individuals of the same species and plot. If none of the extrapolations were possible, values were considered missing (0.5% of leaves).

### Measurement of environmental factors

Air temperature was measured with one data logger (i-button DS1921G, Maxim Integrated, California, USA) located in the centre of each plot at 50 cm above the soil surface. Measurements were taken simultaneously in all plots, every hour during 8 and 11 consecutive days in the dry season (May) and in the wet season (July), respectively. The measurements taken between 5 am and 6 pm were averaged to give the mean diurnal air temperature for each season. To estimate light conditions, we used 10 hemispherical photographs taken every 5 m on the central line of each plot in the dry season (April) and in the wet season (July). The photographs were taken at 1.5 m above the soil surface using a Nikon Coolpix 4500 camera with a fish-eye lens mounted on a tripod following standard protocols<sup>6</sup>. They were analysed with the software HEMIV9 (Delta-T Devices, Cambridge, UK) and the values for the 10 photographs averaged to give the canopy openness (proportion of visible sky) for each season. Soil moisture was measured in the dry (May) and the wet season (November) with two measurements at eight locations within each plot, at a depth of 10 cm, using a soil moisture sensor (SM150-UM-1, Delta-T Devices, Cambridge, UK) and averaged to give one value per plot per season.

The soil physical and chemical variable values were taken from a previous study<sup>1</sup>. In brief, bulk density and soil elemental concentrations were obtained from volumetric samples, soil pH was measured in water and percentages of sand, silt and clay were determined with the hydrometer method. Total elemental concentrations of Al, B, Ca, Cr, Cu, Fe, K, Mg, Mn, Na, Ni, P and Zn were quantified with inductively coupled plasma emission spectroscopy. Total C and N were measured with a COSTECH Elemental Analyzer (Costech Analytical Technologies, California, USA).

### References

1. Powers, J. S., Becknell, J. M., Irving, J. & Perez Aviles, D. Diversity and structure of regenerating tropical dry forests in Costa Rica: Geographic patterns and environmental drivers. *For. Ecol. Manag.* **258**, 959-970 (2009).
2. Cornelissen, J. H. C. *et al.* A handbook of protocols for standardised and easy measurement of plant functional traits worldwide. **51**, 335-380 (2003).
3. Perez-Harguindeguy, N. *et al.* New handbook for standardised measurement of plant functional traits worldwide. **61**, 167-234 (2013).
4. Abramoff, M. D., Magalhaes, P. J. & Ram, S. J. Image Processing with ImageJ. **11**, 36-42 (2004).
5. Powers, J. S. & Tiffin, P. Plant functional type classifications in tropical dry forests in Costa Rica: leaf habit versus taxonomic approaches. *Funct. Ecol.* **24**, 927-936 (2010).
6. Newton, A. C. *Forest Ecology and Conservation - A handbook of techniques.* (Oxford University Press, 2007).

**Supplementary Table S1.** Mean values of leaf functional traits per species. The meanings of the trait abbreviations are given in Appendix S1.

| Species (number of sampled individuals) | Family              | Thick-ness (mm) | Petiole length (mm) | Compoundness | Pubescence | LA (cm <sup>2</sup> ) | SLA (cm <sup>2</sup> g <sup>-1</sup> ) | LDMC (mg g <sup>-1</sup> ) | Density (g cm <sup>-3</sup> ) | Phenological habit | LPC (mg g <sup>-1</sup> ) | LCC (mg g <sup>-1</sup> ) | LNC (mg g <sup>-1</sup> ) | C/N   | N/P   |
|-----------------------------------------|---------------------|-----------------|---------------------|--------------|------------|-----------------------|----------------------------------------|----------------------------|-------------------------------|--------------------|---------------------------|---------------------------|---------------------------|-------|-------|
| <i>Acacia collinsii</i> (101)           | Fabaceae (Mimos.)   | 0.105           | 20.85               | bipinnate    | No         | 67.563                | 182.778                                | 480.11                     | 0.57                          | deciduous          | 1.24                      | 518.82                    | 28.08                     | 18.75 | 24.82 |
| <i>Acosmium panamense</i> (3)           | Fabaceae (Papilio.) | 0.162           | 25.81               | unipinnate   | No         | 107.783               | 230.612                                | 319.93                     | 0.27                          | semi-dec.          | 1.09                      | 518.00                    | 32.28                     | 16.24 | 30.38 |
| <i>Alibertia edulis</i> (76)            | Rubiaceae           | 0.204           | 5.60                | simple       | No         | 37.711                | 125.423                                | 365.84                     | 0.41                          | evergreen          | 1.06                      | 530.45                    | 15.50                     | 35.05 | 16.73 |
| <i>Alaphyllium occidentale</i> (4)      | Sapindaceae         | 0.209           | 54.68               | unipinnate   | Yes        | 119.578               | 222.707                                | 281.11                     | 0.22                          | deciduous          | 1.93                      | 490.75                    | 36.15                     | 14.11 | 19.49 |
| <i>Ardisia revoluta</i> (20)            | Primulaceae         | 0.286           | 7.78                | simple       | No         | 78.593                | 126.112                                | 266.56                     | 0.30                          | evergreen          | 1.35                      | 495.95                    | 12.88                     | 39.33 | 10.40 |
| <i>Ateleia herbert-smithii</i> (1)      | Fabaceae (Papilio.) | 0.161           | 52.32               | unipinnate   | Yes        | 146.742               | 197.364                                | 273.84                     | 0.32                          | deciduous          | 1.35                      | 517.00                    | 32.85                     | 15.74 | 24.35 |
| <i>Bauhinia unguolata</i> (9)           | Fabaceae (Caesalp.) | 0.158           | 11.55               | simple       | Yes        | 23.956                | 213.716                                | 433.41                     | 0.31                          | deciduous          | 1.40                      | 537.11                    | 26.93                     | 20.26 | 19.96 |
| <i>Bursera simarouba</i> (17)           | Burseraceae         | 0.195           | 110.53              | unipinnate   | Yes        | 318.772               | 213.091                                | 232.33                     | 0.25                          | deciduous          | 1.43                      | 475.76                    | 23.01                     | 20.96 | 16.74 |
| <i>Bursera tomentosa</i> (25)           | Burseraceae         | 0.193           | 42.05               | unipinnate   | Yes        | 98.903                | 222.610                                | 290.07                     | 0.26                          | deciduous          | 1.31                      | 498.52                    | 18.55                     | 27.30 | 16.28 |
| <i>Calycophyllum candidissimum</i> (4)  | Rubiaceae           | 0.173           | 5.80                | simple       | Yes        | 50.236                | 318.692                                | 179.09                     | 0.20                          | deciduous          | 1.42                      | 482.75                    | 19.62                     | 24.80 | 13.77 |
| <i>Capparis frondosa</i> (9)            | Capparaceae         | 0.175           | 32.11               | simple       | No         | 82.089                | 127.803                                | 442.12                     | 0.45                          | evergreen          | 0.73                      | 478.78                    | 30.36                     | 15.88 | 45.93 |
| <i>Capparis indica</i> (5)              | Capparaceae         | 0.239           | 7.49                | simple       | No         | 31.934                | 102.254                                | 416.68                     | 0.43                          | evergreen          | 0.70                      | 454.60                    | 33.13                     | 13.98 | 56.38 |
| <i>Casearia arguta</i> (1)              | Salicaceae          | 0.137           | 2.46                | simple       | No         | 30.206                | 280.265                                | 282.00                     | 0.26                          | deciduous          | 1.41                      | 485.00                    | 23.46                     | 20.68 | 16.67 |
| <i>Casearia corymbosa</i> (13)          | Salicaceae          | 0.149           | 2.23                | simple       | No         | 46.594                | 212.934                                | 297.36                     | 0.33                          | deciduous          | 1.74                      | 485.00                    | 26.01                     | 18.98 | 15.82 |
| <i>Casearia sylvestris</i> (10)         | Salicaceae          | 0.150           | 3.13                | simple       | No         | 17.054                | 186.192                                | 357.78                     | 0.37                          | evergreen          | 1.30                      | 497.00                    | 30.66                     | 16.98 | 24.49 |
| <i>Castilla elastica</i> (13)           | Moraceae            | 0.144           | 8.89                | simple       | Yes        | 161.371               | 488.066                                | 221.65                     | 0.15                          | semi-dec.          | 2.55                      | 463.77                    | 42.43                     | 11.01 | 16.93 |
| <i>Chomelia spinosa</i> (1)             | Rubiaceae           | 0.169           | 7.50                | simple       | Yes        | 27.446                | 249.634                                | 243.39                     | 0.24                          | deciduous          | 1.08                      | 517.00                    | 25.77                     | 20.07 | 23.89 |
| <i>Cochlospermum vitifolium</i> (14)    | Bixaceae            | 0.155           | 169.23              | simple       | Yes        | 154.852               | 171.641                                | 280.31                     | 0.39                          | deciduous          | 1.46                      | 522.79                    | 21.09                     | 25.07 | 15.89 |
| <i>Cordia gerascanthus</i> (3)          | Boraginaceae        | 0.184           | 11.55               | simple       | Yes        | 50.842                | 236.760                                | 240.92                     | 0.23                          | deciduous          | 1.46                      | 441.00                    | 27.18                     | 16.53 | 18.59 |
| <i>Cordia panamensis</i> (3)            | Boraginaceae        | 0.226           | 11.92               | simple       | Yes        | 140.469               | 200.219                                | 368.46                     | 0.24                          | deciduous          | 1.42                      | 466.67                    | 24.07                     | 19.52 | 18.43 |
| <i>Cornutia grandifolia</i> (1)         | Lamiaceae           | 0.182           | 2.74                | simple       | Yes        | 49.408                | 308.369                                | 188.35                     | 0.18                          | deciduous          | 2.07                      | 495.00                    | 35.10                     | 14.10 | 16.97 |
| <i>Crescentia alata</i> (1)             | Bignoniaceae        | 0.208           | 85.30               | unipinnate   | No         | 22.585                | 186.914                                | 298.98                     | 0.26                          | semi-dec.          | 1.37                      | 485.00                    | 27.43                     | 17.68 | 20.05 |
| <i>Dilodendron costaricense</i> (1)     | Sapindaceae         | 0.120           | 85.69               | bipinnate    | Yes        | 421.057               | 173.939                                | 474.04                     | 0.49                          | deciduous          | 0.95                      | 541.00                    | 18.02                     | 30.03 | 18.93 |
| <i>Diospyros salicifolia</i> (11)       | Ebenaceae           | 0.206           | 4.71                | simple       | Yes        | 27.172                | 143.419                                | 388.04                     | 0.36                          | deciduous          | 1.24                      | 487.73                    | 19.31                     | 25.70 | 17.30 |
| <i>Erythroxylum havanense</i> (17)      | Erythroxylaceae     | 0.185           | 2.71                | simple       | No         | 13.793                | 197.601                                | 355.85                     | 0.28                          | deciduous          | 1.26                      | 481.76                    | 27.94                     | 17.30 | 22.73 |
| <i>Eugenia monticola</i> (7)            | Myrtaceae           | 0.180           | 2.26                | simple       | No         | 5.792                 | 194.534                                | 333.50                     | 0.29                          | deciduous          | 1.39                      | 536.43                    | 19.44                     | 27.63 | 15.09 |
| <i>Eugenia salamensis</i> (1)           | Myrtaceae           | 0.217           | 2.05                | simple       | Yes        | 135.639               | 139.735                                | 357.14                     | 0.33                          | deciduous          | 1.45                      | 517.00                    | 14.94                     | 34.62 | 10.33 |
| <i>Euphorbia schlechtendalii</i> (19)   | Euphorbiaceae       | 0.140           | 18.18               | simple       | No         | 3.602                 | 345.826                                | 257.80                     | 0.22                          | deciduous          | 2.26                      | 506.95                    | 22.73                     | 22.58 | 10.33 |
| <i>Genipa americana</i> (5)             | Rubiaceae           | 0.212           | 4.62                | simple       | Yes        | 566.290               | 159.599                                | 299.39                     | 0.30                          | deciduous          | 1.22                      | 505.60                    | 21.02                     | 24.41 | 17.51 |
| <i>Gliricidia sepium</i> (10)           | Fabaceae (Papilio.) | 0.227           | 28.70               | unipinnate   | Yes        | 142.908               | 183.376                                | 228.63                     | 0.25                          | deciduous          | 1.79                      | 505.10                    | 33.61                     | 15.08 | 19.66 |
| <i>Guazuma ulmifolia</i> (4)            | Sterculiaceae       | 0.146           | 10.14               | simple       | Yes        | 35.019                | 333.078                                | 255.00                     | 0.21                          | deciduous          | 1.36                      | 475.00                    | 25.95                     | 18.82 | 19.46 |
| <i>Guettarda macrosperma</i> (14)       | Rubiaceae           | 0.142           | 12.17               | simple       | Yes        | 44.818                | 330.995                                | 270.56                     | 0.24                          | deciduous          | 1.16                      | 486.21                    | 23.05                     | 21.71 | 21.05 |
| <i>Haematoxylum brasiletto</i> (8)      | Fabaceae (Caesalp.) | 0.139           | 4.30                | simple       | No         | 3.391                 | 235.927                                | 357.99                     | 0.32                          | deciduous          | 1.48                      | 509.38                    | 22.29                     | 23.24 | 17.69 |
| <i>Hirtella racemosa</i> (39)           | Chrysobalanaceae    | 0.157           | 2.48                | simple       | No         | 14.128                | 149.284                                | 468.53                     | 0.45                          | evergreen          | 0.77                      | 493.87                    | 13.30                     | 37.44 | 19.32 |
| <i>Jacquinia nervosa</i> (2)            | Primulaceae         | 0.282           | 4.47                | simple       | No         | 7.809                 | 90.654                                 | 431.80                     | 0.40                          | deciduous          | 0.21                      | 503.00                    | 11.00                     | 47.16 | 53.98 |
| <i>Karwinskia calderonii</i> (1)        | Rhamnaceae          | 0.148           | 4.93                | simple       | No         | 7.474                 | 224.427                                | 404.13                     | 0.31                          | deciduous          | 1.42                      | 510.00                    | 25.00                     | 20.40 | 17.59 |

| Species (number of sampled individuals) | Family              | Thickness (mm) | Petiole length (mm) | Compoundness | Pubescence | LA (cm <sup>2</sup> ) | SLA (cm <sup>2</sup> g <sup>-1</sup> ) | LDMC (mg g <sup>-1</sup> ) | Density (g cm <sup>-3</sup> ) | Phenological habit | LPC (mg g <sup>-1</sup> ) | LCC (mg g <sup>-1</sup> ) | LNC (mg g <sup>-1</sup> ) | C/N   | N/P   |
|-----------------------------------------|---------------------|----------------|---------------------|--------------|------------|-----------------------|----------------------------------------|----------------------------|-------------------------------|--------------------|---------------------------|---------------------------|---------------------------|-------|-------|
| <i>Lonchocarpus minimiflorus</i> (4)    | Fabaceae (Papilio.) | 0.183          | 20.49               | unipinnate   | Yes        | 54.405                | 210.065                                | 358.23                     | 0.28                          | deciduous          | 1.32                      | 458.00                    | 30.35                     | 15.37 | 24.92 |
| <i>Lonchocarpus rugosus</i> (4)         | Fabaceae (Papilio.) | 0.169          | 38.01               | unipinnate   | Yes        | 130.420               | 234.619                                | 365.92                     | 0.26                          | semi-dec.          | 1.36                      | 503.25                    | 29.93                     | 17.09 | 22.78 |
| <i>Luehea candida</i> (17)              | Malvaceae           | 0.163          | 4.20                | simple       | Yes        | 75.304                | 379.104                                | 324.29                     | 0.18                          | semi-dec.          | 2.01                      | 500.18                    | 26.07                     | 19.95 | 13.14 |
| <i>Luehea speciosa</i> (24)             | Malvaceae           | 0.162          | 3.80                | simple       | Yes        | 47.935                | 270.642                                | 422.62                     | 0.24                          | semi-dec.          | 1.43                      | 500.38                    | 27.22                     | 18.62 | 20.03 |
| <i>Mabea occidentalis</i> (2)           | Euphorbiaceae       | 0.162          | 6.77                | simple       | Yes        | 15.709                | 134.664                                | 436.56                     | 0.47                          | evergreen          | 1.68                      | 548.00                    | 22.19                     | 24.70 | 13.25 |
| <i>Machaerium biovulatum</i> (4)        | Fabaceae (Papilio.) | 0.139          | 36.27               | unipinnate   | Yes        | 122.095               | 201.581                                | 405.79                     | 0.36                          | deciduous          | 1.22                      | 490.50                    | 28.33                     | 17.36 | 24.24 |
| <i>Malvaviscus arboreus</i> (26)        | Malvaceae           | 0.231          | 46.37               | simple       | Yes        | 77.501                | 283.427                                | 195.13                     | 0.16                          | evergreen          | 1.66                      | 409.50                    | 29.69                     | 14.30 | 18.44 |
| <i>Manilkara chicle</i> (11)            | Sapotaceae          | 0.216          | 16.40               | simple       | No         | 90.120                | 103.807                                | 428.14                     | 0.45                          | evergreen          | 0.63                      | 510.27                    | 15.72                     | 33.07 | 28.71 |
| <i>Margaritaria nobilis</i> (3)         | Phyllanthaceae      | 0.149          | 3.29                | simple       | Yes        | 42.572                | 354.351                                | 218.63                     | 0.19                          | deciduous          | 1.76                      | 472.67                    | 32.41                     | 14.72 | 18.42 |
| <i>Maytenus segoviarum</i> (5)          | Celastraceae        | 0.278          | 4.98                | simple       | No         | 23.376                | 92.268                                 | 411.21                     | 0.40                          | semi-dec.          | 1.02                      | 536.60                    | 13.19                     | 40.93 | 13.35 |
| <i>Mouriri myrtilloides</i> (7)         | Melastomataceae     | 0.175          | 1.11                | simple       | No         | 9.232                 | 122.793                                | 458.76                     | 0.49                          | evergreen          | 0.72                      | 500.14                    | 14.86                     | 33.94 | 24.28 |
| <i>Myconia argentea</i> (2)             | Melastomataceae     | 0.224          | 63.32               | simple       | Yes        | 187.228               | 113.490                                | 335.75                     | 0.40                          | evergreen          | 0.84                      | 471.50                    | 20.46                     | 23.06 | 24.53 |
| <i>Myrospermum frutescens</i> (3)       | Fabaceae (Papilio.) | 0.108          | 15.39               | unipinnate   | No         | 60.955                | 346.173                                | 268.76                     | 0.27                          | deciduous          | 2.10                      | 504.67                    | 30.69                     | 16.65 | 14.73 |
| <i>Ocotea veraguensis</i> (11)          | Lauraceae           | 0.155          | 6.82                | simple       | No         | 24.017                | 178.808                                | 417.11                     | 0.37                          | evergreen          | 1.02                      | 529.73                    | 28.49                     | 18.72 | 29.64 |
| <i>Pithecellobium dulce</i> (1)         | Fabaceae (Mimos.)   | 0.201          | 18.67               | bipinnate    | No         | 21.719                | 161.291                                | 346.26                     | 0.31                          | semi-dec.          | 1.61                      | 476.00                    | 33.34                     | 14.28 | 20.76 |
| <i>Quercus oleoides</i> (4)             | Fagaceae            | 0.270          | 3.53                | simple       | Yes        | 22.791                | 83.723                                 | 493.80                     | 0.45                          | evergreen          | 0.95                      | 522.25                    | 15.76                     | 33.45 | 19.11 |
| <i>Randia monantha</i> (16)             | Rubiaceae           | 0.179          | 8.21                | simple       | Yes        | 27.747                | 267.136                                | 293.91                     | 0.22                          | deciduous          | 0.88                      | 463.44                    | 23.79                     | 19.63 | 29.16 |
| <i>Rehdera trinervis</i> (84)           | Verbenaceae         | 0.261          | 6.43                | simple       | Yes        | 28.080                | 144.616                                | 322.89                     | 0.28                          | deciduous          | 1.05                      | 501.71                    | 17.23                     | 29.60 | 18.83 |
| <i>Roupala montana</i> (1)              | Proteaceae          | 0.231          | 23.91               | unipinnate   | No         | 54.697                | 83.213                                 | 558.57                     | 0.53                          | semi-dec.          | 0.35                      | 539.00                    | 11.29                     | 47.75 | 31.92 |
| <i>Sapindus saponaria</i> (5)           | Sapindaceae         | 0.178          | 25.86               | unipinnate   | No         | 345.621               | 177.433                                | 277.62                     | 0.33                          | evergreen          | 2.70                      | 512.20                    | 33.87                     | 15.64 | 13.16 |
| <i>Schoepfia schreberi</i> (1)          | Schoepfiaceae       | 0.262          | 2.79                | simple       | No         | 13.842                | 130.001                                | 289.41                     | 0.29                          | evergreen          | 1.75                      | 459.00                    | 17.62                     | 26.05 | 10.04 |
| <i>Sebastiania pavoniana</i> (37)       | Euphorbiaceae       | 0.146          | 6.58                | simple       | No         | 30.969                | 277.146                                | 283.14                     | 0.26                          | deciduous          | 1.99                      | 489.76                    | 24.08                     | 20.56 | 13.26 |
| <i>Semialarium mexicanum</i> (66)       | Celastraceae        | 0.261          | 3.19                | simple       | Yes        | 29.732                | 135.024                                | 294.47                     | 0.30                          | deciduous          | 1.15                      | 447.18                    | 16.02                     | 28.31 | 15.08 |
| <i>Simarouba glauca</i> (3)             | Simaroubaceae       | 0.228          | 71.18               | unipinnate   | Yes        | 212.942               | 155.077                                | 344.45                     | 0.31                          | evergreen          | 1.03                      | 491.00                    | 20.12                     | 26.02 | 21.89 |
| <i>Sloanea terniflora</i> (2)           | Elaeocarpaceae      | 0.170          | 8.42                | simple       | No         | 33.977                | 126.129                                | 506.22                     | 0.47                          | evergreen          | 0.77                      | 500.50                    | 13.85                     | 36.57 | 18.54 |
| <i>Spondias monbin</i> (2)              | Anacardiaceae       | 0.234          | 46.37               | unipinnate   | No         | 179.375               | 208.947                                | 211.77                     | 0.22                          | deciduous          | 1.67                      | 473.00                    | 22.47                     | 21.33 | 16.15 |
| <i>Stemmadenia obovata</i> (1)          | Apocynaceae         | 0.173          | 4.50                | simple       | Yes        | 141.603               | 344.964                                | 171.30                     | 0.17                          | deciduous          | 1.96                      | 482.00                    | 36.15                     | 13.33 | 18.42 |
| <i>Swietenia macrophylla</i> (2)        | Meliaceae           | 0.151          | 74.57               | unipinnate   | No         | 269.822               | 189.832                                | 350.81                     | 0.36                          | deciduous          | 0.84                      | 496.50                    | 18.49                     | 26.87 | 24.37 |
| <i>Tabebuia ochracea</i> (17)           | Bignoniaceae        | 0.166          | 147.72              | unipinnate   | Yes        | 417.076               | 216.145                                | 373.81                     | 0.30                          | deciduous          | 1.94                      | 495.82                    | 37.39                     | 13.40 | 19.88 |
| <i>Tabebuia rosea</i> (7)               | Bignoniaceae        | 0.192          | 145.44              | unipinnate   | No         | 407.550               | 174.315                                | 266.36                     | 0.32                          | deciduous          | 1.75                      | 488.57                    | 21.59                     | 22.95 | 12.84 |
| <i>Trophis racemosa</i> (1)             | Moraceae            | 0.161          | 5.50                | simple       | No         | 44.101                | 235.109                                | 356.94                     | 0.27                          | evergreen          | 1.29                      | 465.00                    | 23.17                     | 20.07 | 18.01 |
| <i>Xylosma flexuosa</i> (4)             | Salicaceae          | 0.226          | 1.52                | simple       | No         | 9.723                 | 115.393                                | 419.94                     | 0.41                          | evergreen          | 0.84                      | 483.25                    | 12.85                     | 37.69 | 16.49 |
| <i>Zuelania guidonia</i> (2)            | Salicaceae          | 0.206          | 6.48                | simple       | Yes        | 75.134                | 198.590                                | 330.98                     | 0.25                          | deciduous          | 1.36                      | 507.50                    | 22.75                     | 23.28 | 17.77 |
|                                         | Minimum             | 0.105          | 1.11                | NA           | NA         | 3.391                 | 83.213                                 | 171.30                     | 0.15                          | NA                 | 0.21                      | 409.50                    | 11.00                     | 11.01 | 10.04 |
|                                         | Maximum             | 0.286          | 169.23              | NA           | NA         | 566.290               | 488.066                                | 558.57                     | 0.53                          | NA                 | 2.70                      | 548.00                    | 42.43                     | 47.75 | 56.38 |

**Supplementary Table S2.** Environmental factors measured for each forest type. For correlation with successional age, the first number is the Pearson coefficient; *P*-values are given in brackets. Correlations with *P* < 0.1 are given in bold.

|                                                        | Mixed forest        |                                   | Oak forest          |                                   |
|--------------------------------------------------------|---------------------|-----------------------------------|---------------------|-----------------------------------|
|                                                        | Mean (range)        | Correlation with successional age | Mean (range)        | Correlation with successional age |
| Successional age (years)                               | 33.3 (19-67)        |                                   | 25.3 (12-37)        |                                   |
| Basal area adults (m <sup>2</sup> ha <sup>-1</sup> )   | 18.9 (13.0-27.2)    | 0.30 (0.566)                      | 12.5 (5.3-20.3)     | 0.70 (0.122)                      |
| Basal area saplings (m <sup>2</sup> ha <sup>-1</sup> ) | 0.4 (0.2-0.9)       | -0.54 (0.266)                     | 1.0 (0.3-1.6)       | -0.17 (0.741)                     |
| Air temperature (dry season) (°C)                      | 31.2 (30.2-32.0)    | <b>-0.75 (0.087)</b>              | 32.0 (31.0-33.2)    | -0.33 (0.526)                     |
| Air temperature (wet season) (°C)                      | 28.5 (27.9-29.2)    | -0.61 (0.200)                     | 29.7 (29.0-30.3)    | <b>-0.76 (0.082)</b>              |
| Canopy openness (dry season) (prop.)                   | 0.32 (0.14-0.49)    | <b>-0.90 (0.016)</b>              | 0.36 (0.14-0.53)    | <b>-0.84 (0.037)</b>              |
| Canopy openness (wet season) (prop.)                   | 0.10 (0.08-0.13)    | -0.72 (0.105)                     | 0.18 (0.12-0.29)    | <b>-0.98 (0.001)</b>              |
| Soil moisture (dry season) (% vol)                     | 19.5 (17.1-22.4)    | 0.32 (0.531)                      | 13.0 (5.2-19.4)     | -0.55 (0.260)                     |
| Soil moisture (wet season) (% vol)                     | 32.4 (30.6-35.0)    | 0.51 (0.305)                      | 24.1 (16.8-30.1)    | -0.28 (0.585)                     |
| Soil pH                                                | 6.1 (5.7-6.7)       | -0.37 (0.473)                     | 5.8 (5.7-6.1)       | -0.20 (0.706)                     |
| Soil stone content (g cm <sup>-3</sup> )               | 0.008 (0.003-0.012) | 0.56 (0.253)                      | 0.089 (0.007-0.327) | -0.41 (0.421)                     |
| Soil bulk density (g cm <sup>-3</sup> )                | 0.91 (0.85-1.03)    | -0.30 (0.563)                     | 0.80 (0.58-1.06)    | 0.26 (0.616)                      |
| Soil sand concentration (%)                            | 40.0 (35.1-47.3)    | 0.01 (0.987)                      | 44.4 (32.6-56.7)    | 0.50 (0.316)                      |
| Soil clay concentration (%)                            | 31.8 (30.5-35.3)    | -0.12 (0.815)                     | 25.0 (16.7-33.4)    | -0.34 (0.511)                     |
| Soil silt concentration (%)                            | 28.2 (22.0-34.3)    | 0.04 (0.937)                      | 30.5 (23.6-41.1)    | -0.37 (0.471)                     |
| Soil Al concentration (ppm)                            | 47709 (37940-58550) | <b>-0.84 (0.038)</b>              | 47319 (41671-59503) | -0.27 (0.610)                     |
| Soil B concentration (ppm)                             | 19 (13-26)          | -0.42 (0.412)                     | 18 (15-20)          | -0.04 (0.938)                     |
| Soil C concentration (%)                               | 3.53 (2.99-4.14)    | 0.13 (0.804)                      | 3.01 (2.33-3.61)    | 0.14 (0.785)                      |
| Soil Ca concentration (ppm)                            | 7332 (4185-15248)   | -0.31 (0.555)                     | 4842 (1932-6337)    | 0.17 (0.742)                      |
| Soil Cr concentration (ppm)                            | 17 (6-56)           | -0.09 (0.863)                     | 10 (8-15)           | -0.23 (0.657)                     |
| Soil Cu concentration (ppm)                            | 65 (44-114)         | -0.39 (0.444)                     | 50 (36-66)          | -0.01 (0.981)                     |
| Soil Fe concentration (ppm)                            | 33359 (22819-40040) | -0.66 (0.150)                     | 32511 (24211-41916) | -0.43 (0.401)                     |
| Soil K concentration (ppm)                             | 1205 (440-3731)     | -0.20 (0.698)                     | 512 (386-630)       | -0.35 (0.497)                     |
| Soil N concentration (%)                               | 0.31 (0.27-0.38)    | 0.38 (0.456)                      | 0.24 (0.19-0.28)    | 0.12 (0.817)                      |
| Soil Mg concentration (ppm)                            | 2840 (972-9939)     | -0.17 (0.745)                     | 1206 (825-1926)     | 0.16 (0.768)                      |
| Soil Mn concentration (ppm)                            | 762 (366-1590)      | -0.49 (0.321)                     | 620 (208-1262)      | -0.55 (0.256)                     |
| Soil Na concentration (ppm)                            | 719 (516-913)       | -0.23 (0.657)                     | 739 (238-1204)      | 0.35 (0.492)                      |
| Soil Ni concentration (ppm)                            | 15 (5-49)           | -0.09 (0.864)                     | 35 (9-149)          | -0.38 (0.455)                     |
| Soil P concentration (ppm)                             | 378 (124-1272)      | -0.19 (0.715)                     | 108 (31-213)        | 0.22 (0.682)                      |
| Soil Zn concentration (ppm)                            | 54 (27-69)          | -0.67 (0.145)                     | 33 (19-51)          | -0.43 (0.400)                     |

**Supplementary Table S3.** Community mean leaf trait values per forest type (mean of the six plot mean values for each forest type, with each plot mean calculated from the values for each individual sapling in the plot).

| Forest type                                           | Oak forest | Mixed forest |
|-------------------------------------------------------|------------|--------------|
| Leaf thickness (mm)                                   | 0.175      | 0.186        |
| Petiole length (mm)                                   | 19.88      | 22.35        |
| Leaf area (cm <sup>2</sup> )                          | 58.685     | 92.618       |
| Specific leaf area (cm <sup>2</sup> g <sup>-1</sup> ) | 170.630    | 230.177      |
| Leaf dry matter content (mg g <sup>-1</sup> )         | 392.68     | 311.93       |
| Leaf density (g cm <sup>-3</sup> )                    | 0.41       | 0.28         |
| Leaf phosphorous concentration (mg g <sup>-1</sup> )  | 1.26       | 1.37         |
| Leaf carbon concentration (mg g <sup>-1</sup> )       | 507.31     | 480.50       |
| Leaf nitrogen concentration (mg g <sup>-1</sup> )     | 21.66      | 25.45        |
| Leaf C/N ratio                                        | 25.87      | 20.99        |
| Leaf N/P ratio                                        | 19.55      | 21.03        |
| Proportion of simple-leaved individuals               | 0.633      | 0.795        |
| Proportion of pubescent individuals                   | 0.335      | 0.567        |
| Proportion of deciduous individuals                   | 0.690      | 0.563        |
| Proportion of legume individuals                      | 0.329      | 0.066        |

**Supplementary Table S4.** Contribution (“Contrib.”) and coefficient (“Coef.”) of each leaf trait and each environmental factor to the first two axes of the among-species and within-species partial RLQs. Shading indicates traits and environmental factors that contribute more to an axis than if all traits and environmental factors contributed equally (> 4.7% for traits and > 10% for environmental factors). The meanings of the trait abbreviations are given in Appendix S1.

| Forest type           | Type of variable | Variable                            | Among-species RLQ |       |          |       | Within-species RLQ |       |          |       |
|-----------------------|------------------|-------------------------------------|-------------------|-------|----------|-------|--------------------|-------|----------|-------|
|                       |                  |                                     | Axis 1            |       | Axis 2   |       | Axis 1             |       | Axis 2   |       |
|                       |                  |                                     | Contrib.          | Coef. | Contrib. | Coef. | Contrib.           | Coef. | Contrib. | Coef. |
| Mixed forest          | Trait            | Thickness                           | 1.58              | -0.13 | 2.23     | 0.15  | 26.74              | -0.52 | 2.33     | 0.15  |
|                       |                  | Petiole length                      | 0.07              | -0.03 | 4.8      | -0.22 | 0.03               | 0.02  | 4.12     | 0.2   |
|                       |                  | Compoundness (simple)               | 0.42              | 0.07  | 1.62     | 0.14  | 0                  | 0     | 0        | 0     |
|                       |                  | Compoundness (unipinnate)           | 0.52              | -0.18 | 4.32     | -0.51 | 0                  | 0     | 0.01     | -0.02 |
|                       |                  | Compoundness (bipinnate)            | 2.2               | -0.77 | 2.29     | -0.79 | 0                  | 0     | 0        | 0     |
|                       |                  | Pubescence (glabrous)               | 9.3               | 0.47  | 7.03     | 0.41  | 0.17               | 0.06  | 0.06     | -0.04 |
|                       |                  | Pubescence (pubescent)              | 6.56              | -0.33 | 4.97     | -0.29 | 0.12               | -0.05 | 0.04     | 0.03  |
|                       |                  | LA                                  | 0.09              | 0.03  | 2.41     | -0.16 | 0.01               | 0.01  | 20.62    | 0.45  |
|                       |                  | SLA                                 | 0.22              | 0.05  | 0.89     | -0.09 | 19.13              | 0.44  | 1.83     | -0.14 |
|                       |                  | LDMC                                | 0.42              | 0.06  | 9.34     | -0.31 | 3.81               | -0.2  | 0.91     | -0.1  |
|                       |                  | Density                             | 5                 | 0.22  | 0.03     | 0.02  | 5.15               | -0.23 | 3.28     | -0.18 |
|                       |                  | Phenological habit (deciduous)      | 11.09             | -0.43 | 0.11     | 0.04  | 0                  | 0     | 0        | 0     |
|                       |                  | Phenological habit (evergreen)      | 30.82             | 1.08  | 5.02     | 0.44  | 0                  | 0     | 0        | 0     |
|                       |                  | Phenological habit (semi-deciduous) | 0.54              | -0.2  | 14.28    | -1.02 | 0                  | 0     | 0        | 0     |
|                       |                  | LPC                                 | 2.26              | 0.15  | 0.5      | 0.07  | 25.52              | 0.51  | 4.85     | 0.22  |
|                       |                  | LCC                                 | 0.09              | 0.03  | 4.71     | -0.22 | 4.33               | -0.21 | 3.48     | 0.19  |
|                       |                  | LNC                                 | 12.91             | 0.36  | 8.75     | -0.3  | 5.06               | 0.23  | 17.08    | -0.41 |
|                       |                  | C/N                                 | 4.57              | -0.21 | 15.78    | 0.4   | 4.02               | -0.2  | 6.45     | 0.25  |
|                       |                  | N/P                                 | 10.74             | 0.33  | 10.33    | -0.32 | 5.89               | -0.24 | 34.94    | -0.59 |
|                       |                  |                                     | Not legume        | 0.04  | 0.02     | 0.04  | 0.02               | 0     | 0        | 0     |
|                       | Legume           | 0.56                                | -0.29             | 0.55  | -0.29    | 0     | 0                  | 0     | 0        |       |
| Environmental factors |                  | Successional age                    | 26.41             | 0.51  | 4.22     | -0.21 | 16.44              | 0.41  | 16.95    | -0.41 |
|                       |                  | Air temperature (dry season)        | 16.07             | -0.4  | 21.8     | 0.47  | 9.07               | -0.3  | 0.05     | -0.02 |
|                       |                  | Air temperature (wet season)        | 10.48             | -0.32 | 9.23     | -0.3  | 19.77              | -0.44 | 3.25     | -0.18 |
|                       |                  | Canopy openness (dry season)        | 20.84             | -0.46 | 2.95     | -0.17 | 19.67              | -0.44 | 1.96     | 0.14  |
|                       |                  | Canopy openness (wet season)        | 12.69             | -0.36 | 16.22    | -0.4  | 18.62              | -0.43 | 0.33     | 0.06  |
|                       |                  | Basal area adults                   | 3.86              | 0.2   | 10.58    | 0.33  | 15.73              | 0.4   | 11.91    | 0.35  |
|                       |                  | Soil moisture (dry season)          | 2.83              | 0.17  | 30.4     | -0.55 | 0.32               | -0.06 | 2.8      | -0.17 |
|                       |                  | Soil moisture (wet season)          | 6.07              | 0.25  | 0.27     | -0.05 | 0.13               | 0.04  | 9.01     | -0.3  |
|                       |                  | Soil pH                             | 0.7               | -0.08 | 1.72     | -0.13 | 0.02               | 0.01  | 2.24     | -0.15 |
|                       |                  | Soil clay concentration             | 0.04              | -0.02 | 2.62     | -0.16 | 0.21               | 0.05  | 51.48    | 0.72  |



| Forest type                  | Type of variable | Variable                            | Among-species RLQ     |                              |          |       | Within-species RLQ |       |          |       |      |       |
|------------------------------|------------------|-------------------------------------|-----------------------|------------------------------|----------|-------|--------------------|-------|----------|-------|------|-------|
|                              |                  |                                     | Axis 1                |                              | Axis 2   |       | Axis 1             |       | Axis 2   |       |      |       |
|                              |                  |                                     | Contrib.              | Coef.                        | Contrib. | Coef. | Contrib.           | Coef. | Contrib. | Coef. |      |       |
| Oak forest                   | Trait            | Thickness                           | 1.38                  | 0.12                         | 11.13    | 0.33  | 8.45               | -0.29 | 14.52    | -0.38 |      |       |
|                              |                  | Petiole length                      | 0.27                  | -0.05                        | 5.64     | 0.24  | 0.96               | 0.1   | 0.79     | 0.09  |      |       |
|                              |                  | Compoundness (simple)               | 6.02                  | 0.3                          | 0.01     | 0.01  | 0                  | 0     | 0        | -0.01 |      |       |
|                              |                  | Compoundness (unipinnate)           | 0.05                  | 0.08                         | 3.43     | 0.65  | 0                  | -0.02 | 0.03     | 0.06  |      |       |
|                              |                  | Compoundness (bipinnate)            | 17.14                 | -0.83                        | 1.58     | -0.25 | 0                  | 0     | 0        | 0     |      |       |
|                              |                  | Pubescence (glabrous)               | 0.18                  | 0.05                         | 12.37    | -0.44 | 0                  | 0     | 0        | 0     |      |       |
|                              |                  | Pubescence (pubescent)              | 0.31                  | -0.09                        | 21.67    | 0.77  | 0                  | 0     | 0        | 0     |      |       |
|                              |                  | LA                                  | 0.31                  | -0.06                        | 1.86     | 0.14  | 0                  | 0     | 0.78     | 0.09  |      |       |
|                              |                  | SLA                                 | 0.59                  | 0.08                         | 0.36     | -0.06 | 23.74              | 0.49  | 18.32    | 0.43  |      |       |
|                              |                  | LDMC                                | 2.42                  | -0.16                        | 13.75    | -0.37 | 0.31               | -0.06 | 0.03     | 0.02  |      |       |
|                              |                  | Density                             | 9.25                  | -0.3                         | 7.62     | -0.28 | 1.51               | -0.12 | 0.6      | -0.08 |      |       |
|                              |                  | Phenological habit (deciduous)      | 4.95                  | -0.27                        | 3.75     | 0.23  | 0                  | 0     | 0        | 0     |      |       |
|                              |                  | Phenological habit (evergreen)      | 10.48                 | 0.61                         | 10.57    | -0.62 | 0                  | 0     | 0        | 0     |      |       |
|                              |                  | Phenological habit (semi-deciduous) | 0.49                  | 0.37                         | 0.35     | 0.31  | 0                  | 0     | 0        | 0     |      |       |
|                              |                  | LPC                                 | 0                     | 0                            | 1.83     | 0.14  | 32.14              | 0.57  | 16.27    | -0.4  |      |       |
|                              |                  | LCC                                 | 2.96                  | -0.17                        | 0.92     | -0.1  | 0.4                | -0.06 | 0.04     | -0.02 |      |       |
|                              |                  | LNC                                 | 8.35                  | -0.29                        | 0.48     | 0.07  | 2.66               | 0.16  | 14.32    | 0.38  |      |       |
|                              |                  | C/N                                 | 9.15                  | 0.3                          | 1.93     | -0.14 | 3.31               | -0.18 | 13.1     | -0.36 |      |       |
|                              |                  | N/P                                 | 3.92                  | -0.2                         | 0.74     | -0.09 | 26.51              | -0.51 | 21.21    | 0.46  |      |       |
|                              |                  | Not legume                          | 6.62                  | 0.31                         | 0        | 0     | 0                  | 0     | 0        | 0     |      |       |
|                              |                  | Legume                              | 15.17                 | -0.71                        | 0        | 0.01  | 0                  | 0     | 0        | 0     |      |       |
|                              |                  | Environmental factors               | Environmental factors | Successional age             | 17.66    | 0.42  | 3.69               | -0.19 | 11.29    | 0.34  | 4.62 | 0.21  |
|                              |                  |                                     |                       | Air temperature (dry season) | 1.85     | 0.14  | 43.72              | 0.66  | 3.92     | -0.2  | 1.12 | -0.11 |
|                              |                  |                                     |                       | Air temperature (wet season) | 39.03    | -0.62 | 1                  | -0.1  | 0.58     | -0.08 | 0.56 | -0.07 |
|                              |                  |                                     |                       | Canopy openness (dry season) | 1.64     | -0.13 | 26.66              | 0.52  | 8.74     | -0.3  | 12.1 | -0.35 |
| Canopy openness (wet season) | 15.95            |                                     |                       | -0.4                         | 1.39     | 0.12  | 13.9               | -0.37 | 3.7      | -0.19 |      |       |
| Basal area adults            | 2.56             |                                     |                       | -0.16                        | 9.41     | -0.31 | 6.59               | 0.26  | 35.89    | 0.6   |      |       |
| Soil moisture (dry season)   | 10.53            |                                     |                       | -0.32                        | 3.15     | 0.18  | 24.47              | -0.49 | 10.47    | 0.32  |      |       |
| Soil moisture (wet season)   | 2.42             |                                     |                       | -0.16                        | 0.72     | 0.09  | 18.21              | -0.43 | 7.42     | 0.27  |      |       |
| Soil pH                      | 3.74             |                                     |                       | -0.19                        | 0.08     | 0.03  | 5.53               | -0.24 | 1.28     | 0.11  |      |       |
| Soil clay concentration      | 4.62             |                                     |                       | -0.21                        | 10.18    | -0.32 | 6.77               | 0.26  | 22.85    | -0.48 |      |       |

**Supplementary Table S5.** Slopes and significances ( $P$ -values in parentheses) of the linear regressions between successional age and the changes in community mean value of leaf traits due to species turnover only, intraspecific variation (ITV) only, and species turnover and ITV. The relationships with  $P < 0.1$  are in bold. The meanings of the trait abbreviations are given in Appendix S1.

| Forest type  | Trait          | Species turnover |                | ITV            |                | Species turnover and ITV |                |
|--------------|----------------|------------------|----------------|----------------|----------------|--------------------------|----------------|
| Mixed forest | Thickness      | -0.0005          | (0.319)        | <b>-0.0004</b> | <b>(0.088)</b> | -0.0008                  | (0.190)        |
|              | Petiole length | 0.0514           | (0.839)        | -0.0119        | (0.867)        | 0.0395                   | (0.888)        |
|              | LA             | 0.4830           | (0.453)        | -0.2184        | (0.560)        | 0.2646                   | (0.765)        |
|              | SLA            | 0.0770           | (0.926)        | <b>0.5772</b>  | <b>(0.029)</b> | 0.6542                   | (0.498)        |
|              | LDMC           | 0.8322           | (0.247)        | -0.1530        | (0.270)        | 0.6792                   | (0.374)        |
|              | Density        | <b>0.0013</b>    | <b>(0.027)</b> | -0.0002        | (0.373)        | <b>0.0011</b>            | <b>(0.081)</b> |
|              | LPC            | 0.0036           | (0.472)        | 0.0027         | (0.185)        | 0.0063                   | (0.356)        |
|              | LCC            | 0.0715           | (0.654)        | -0.0766        | (0.207)        | -0.0051                  | (0.978)        |
|              | LNC            | <b>0.1905</b>    | <b>(0.061)</b> | <b>0.0432</b>  | <b>(0.014)</b> | <b>0.2337</b>            | <b>(0.036)</b> |
|              | C/N            | -0.1324          | (0.174)        | <b>-0.0313</b> | <b>(0.026)</b> | -0.1637                  | (0.118)        |
|              | N/P            | <b>0.2095</b>    | <b>(0.032)</b> | 0.0097         | (0.785)        | <b>0.2192</b>            | <b>(0.081)</b> |
| Oak forest   | Thickness      | 0.0002           | (0.866)        | -0.0007        | (0.135)        | -0.0005                  | (0.770)        |
|              | Petiole length | -0.1775          | (0.737)        | 0.0801         | (0.460)        | -0.0973                  | (0.859)        |
|              | LA             | -0.0253          | (0.986)        | -0.0057        | (0.981)        | -0.0310                  | (0.985)        |
|              | SLA            | 0.3831           | (0.798)        | <b>1.1635</b>  | <b>(0.059)</b> | 1.5466                   | (0.377)        |
|              | LDMC           | -0.2883          | (0.912)        | -0.1399        | (0.736)        | -0.4281                  | (0.877)        |
|              | Density        | -0.0027          | (0.554)        | -0.0007        | (0.247)        | -0.0035                  | (0.490)        |
|              | LPC            | -0.0036          | (0.767)        | 0.0034         | (0.684)        | -0.0002                  | (0.993)        |
|              | LCC            | -0.4342          | (0.391)        | -0.0292        | (0.663)        | -0.4634                  | (0.376)        |
|              | LNC            | -0.1410          | (0.494)        | 0.0456         | (0.457)        | -0.0954                  | (0.705)        |
|              | C/N            | 0.2088           | (0.409)        | -0.0418        | (0.618)        | 0.1670                   | (0.590)        |
|              | N/P            | -0.0774          | (0.689)        | -0.0470        | (0.727)        | -0.1245                  | (0.686)        |

**Supplementary Figure S1.** Patterns of leaf trait association. Correlation circle in the first factorial plane for the Hill and Smith analysis<sup>1</sup> (multivariate analysis with mixed quantitative and qualitative variables, performed on 2536 leaves collected from 851 saplings of 69 species using the function `dudi.hillsmith` of the package `ade4`<sup>2</sup> in R 3.2.2<sup>3</sup>). Arrows pointing in the same direction (respectively in the opposite direction) represent traits co-varying positively (respectively negatively). The closer two arrows are, the stronger the correlation among the traits. For quantitative traits, the longer the arrow, the stronger the correlation of the trait with the axis. The meanings of the trait abbreviations are given in Appendix S1. “Dec.” stands for “deciduous”.

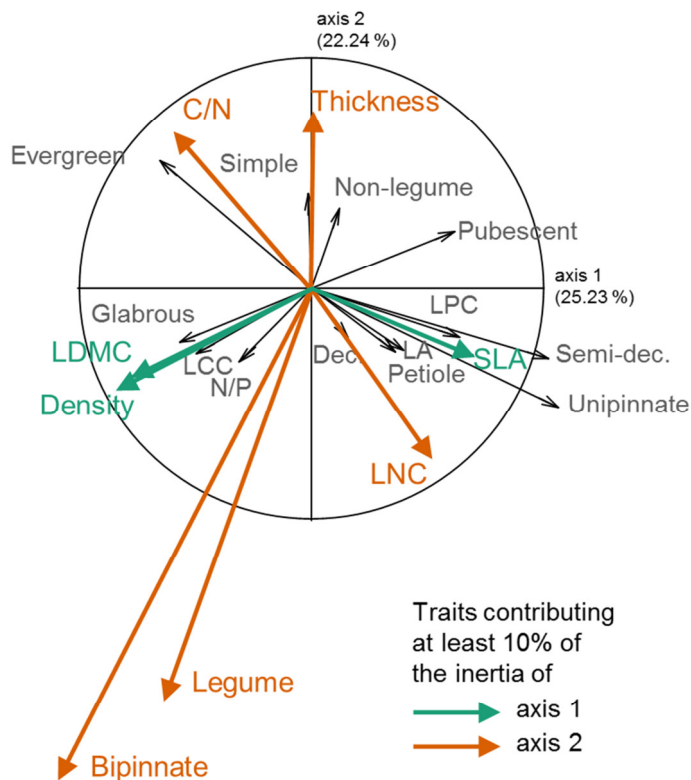

1. Hill, M. O. & Smith, A. J. E. Principal component analysis of taxonomic data with multistate discrete characters. *Taxon* **25**, 249-255 (1976).
2. Dray, S. & Dufour, A.-B. (2007) The `ade4` package: Implementing the duality diagram for ecologists. *Journal of Statistical Software*, 22, 1-20.
3. R core team. *R: A language and environment for statistical computing* <http://www.R-project.org/> (2015).

**Supplementary Figure S2.** Partitioning of the variance of traits across scales, performed on 2539 leaves, 852 individual saplings and 69 species following the method proposed by Messier *et al.*<sup>1</sup>. For chemical traits, the leaf level was not considered because we only made single measurements per individual. The meanings of the trait abbreviations are given in Appendix S1.

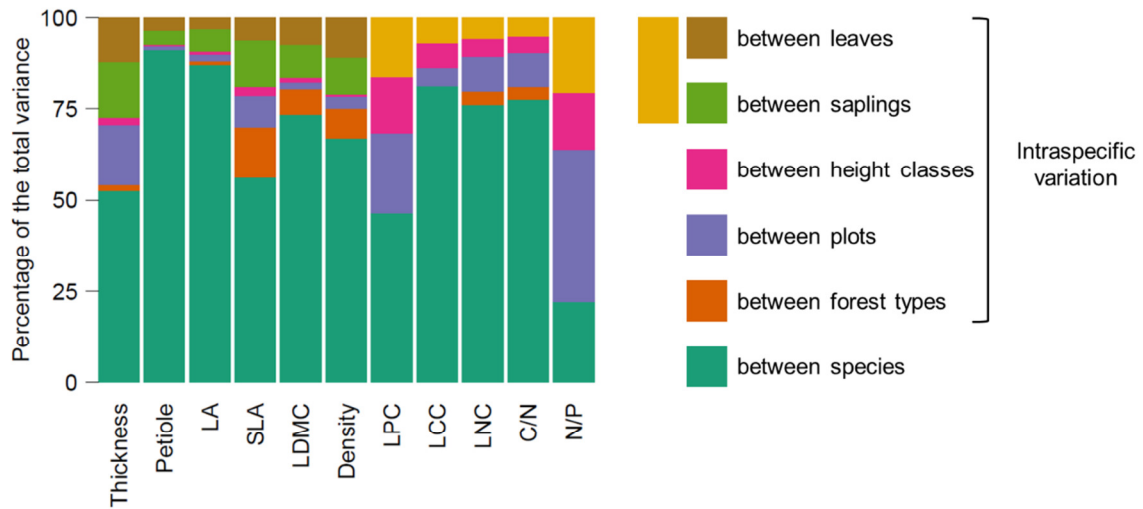

1. Messier, J., McGill, B. J. & Lechowicz, M. J. How do traits vary across ecological scales? A case for trait-based ecology. *Ecol. Lett.* **13**, 838-848 (2010).
